# Supplementary material
Source: Elsevier journal article supplement (https://api.immotoolbox.com/fiche/de/montecarlo/99519/pdfv3/mmc7.pdf)

## Vermietung Monaco

60 000 € / Monat

|                 |                    |              |              |
|-----------------|--------------------|--------------|--------------|
| Produkttyp      | Penthouse/Roof     | Zimmer       | 5+           |
| Totale Fläche   | 702 m <sup>2</sup> | Schlafzimmer | 5            |
| Wohnfläche      | 366 m <sup>2</sup> | Parkplätze   | 4            |
| Terrasse Fläche | 126 m <sup>2</sup> | Keller       | 1            |
| Garten Fläche   | 210 m <sup>2</sup> | Gebäude      | Memmo Center |
| Verfügbar ab    | 01/06/2024         | District     | Fontvieille  |

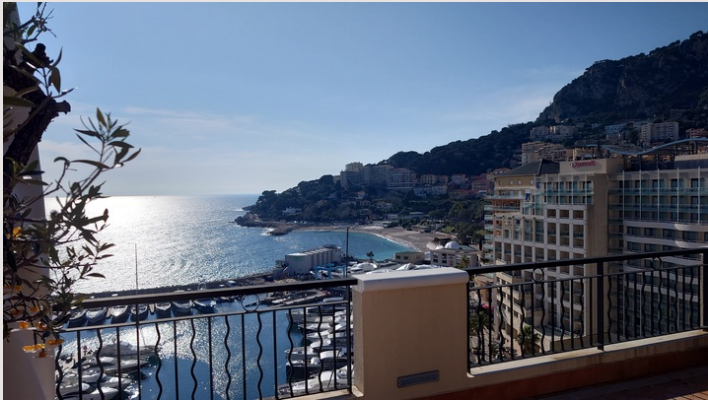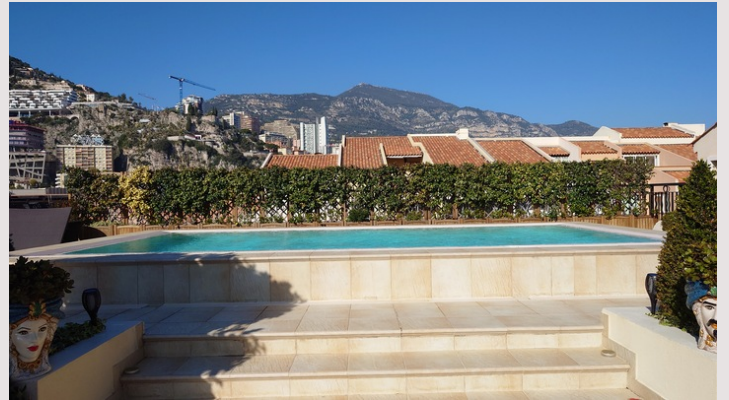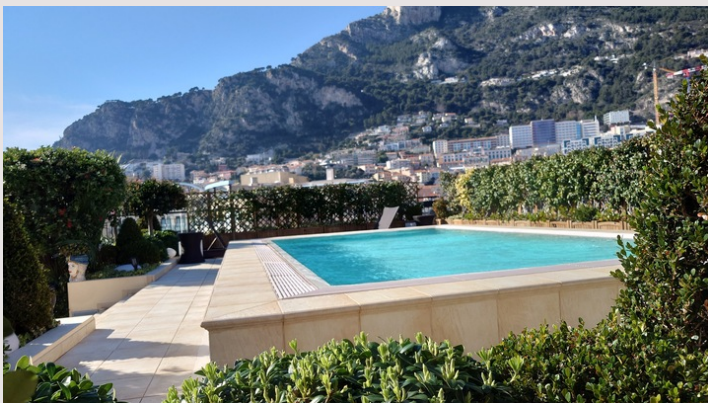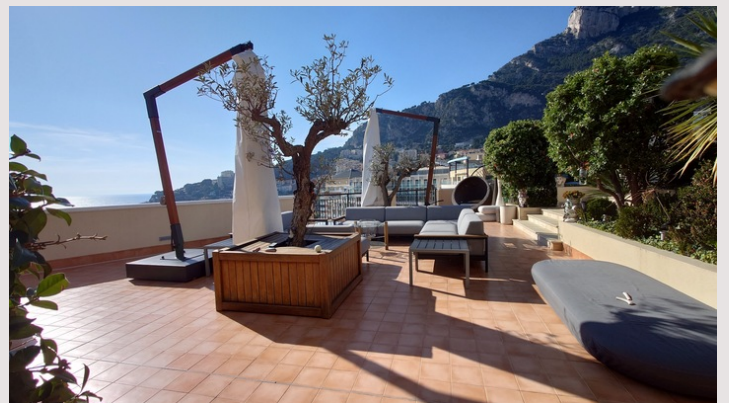

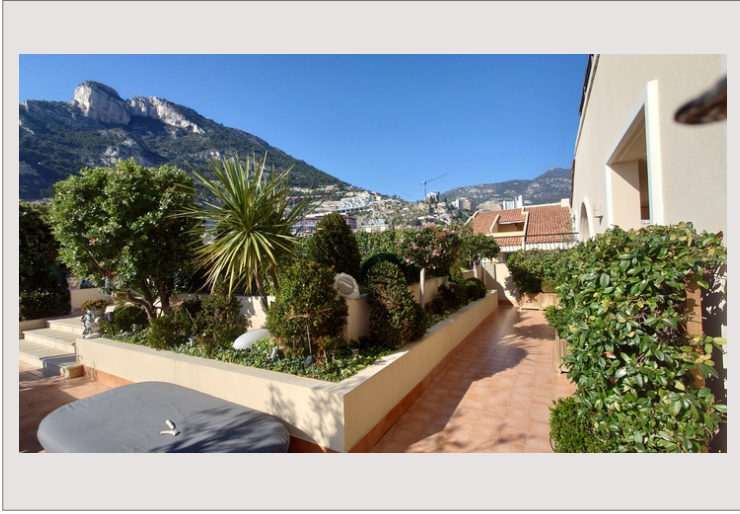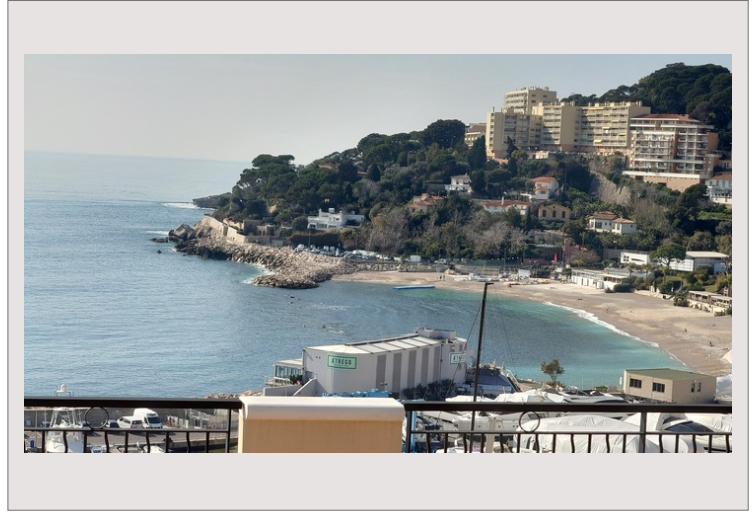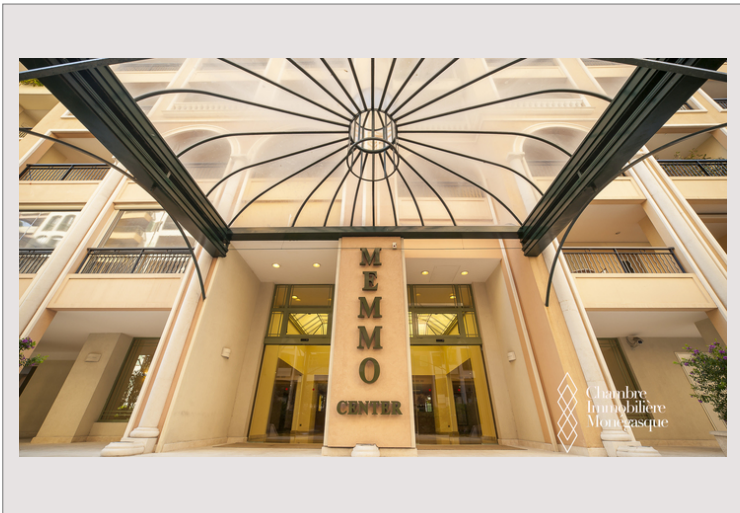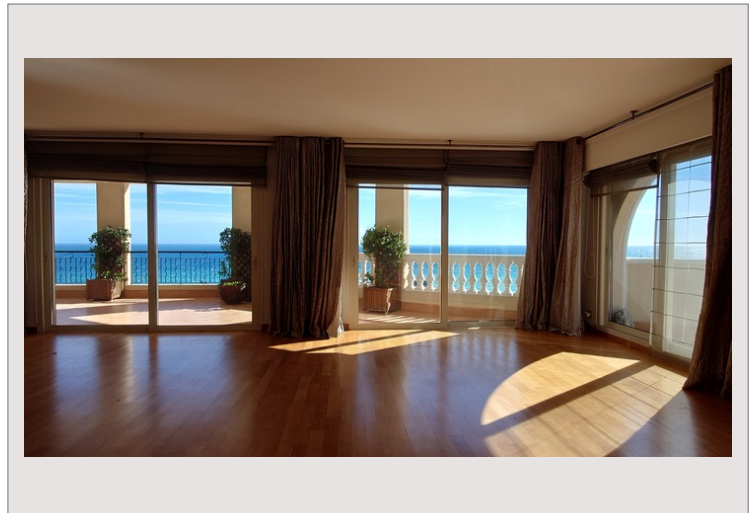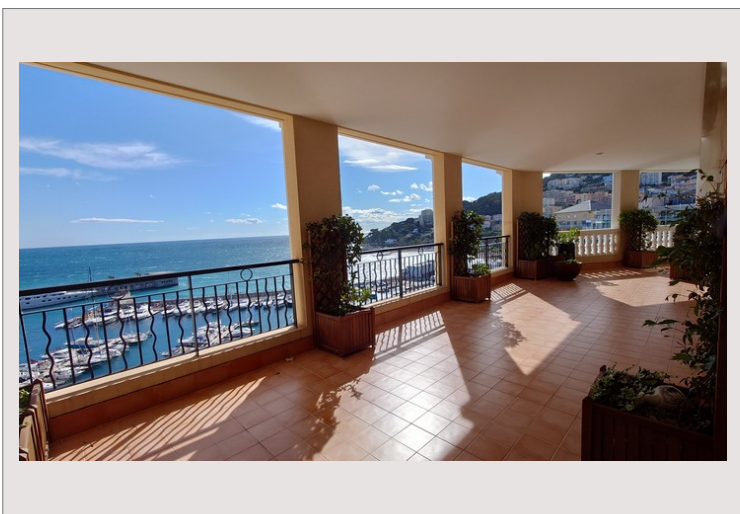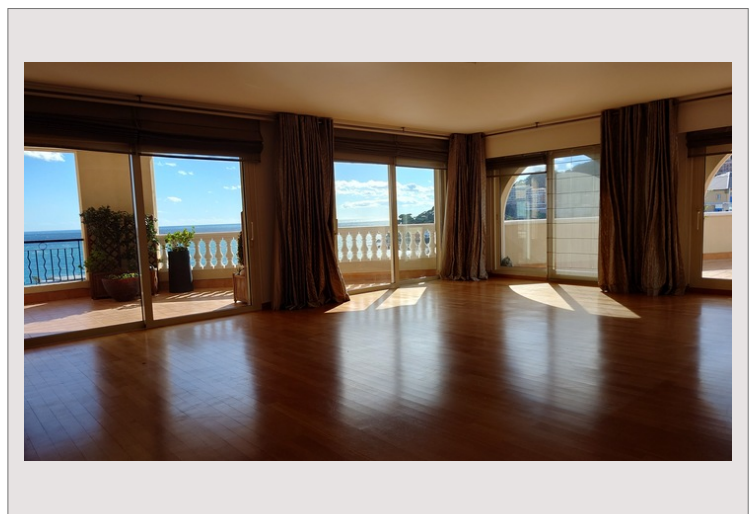

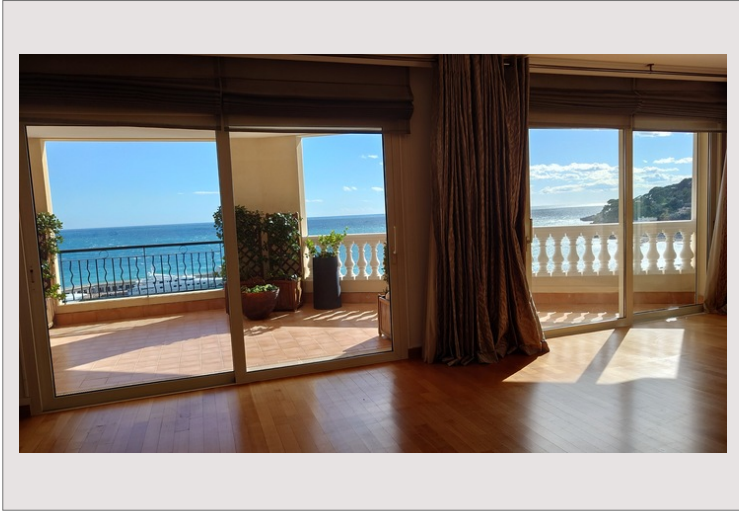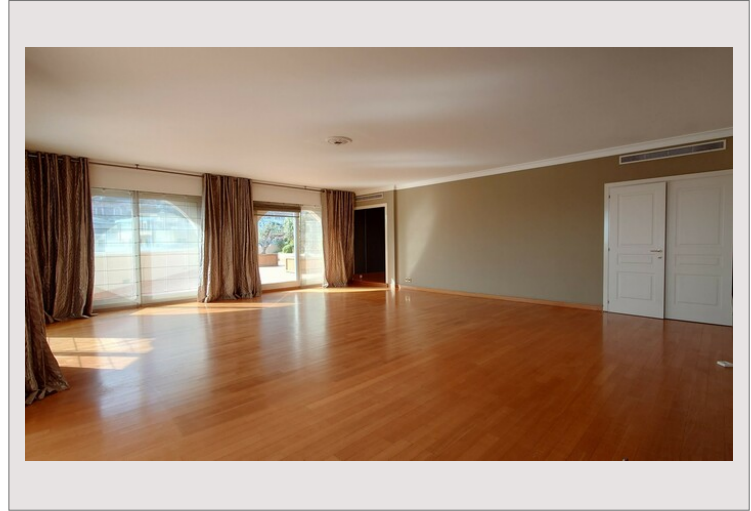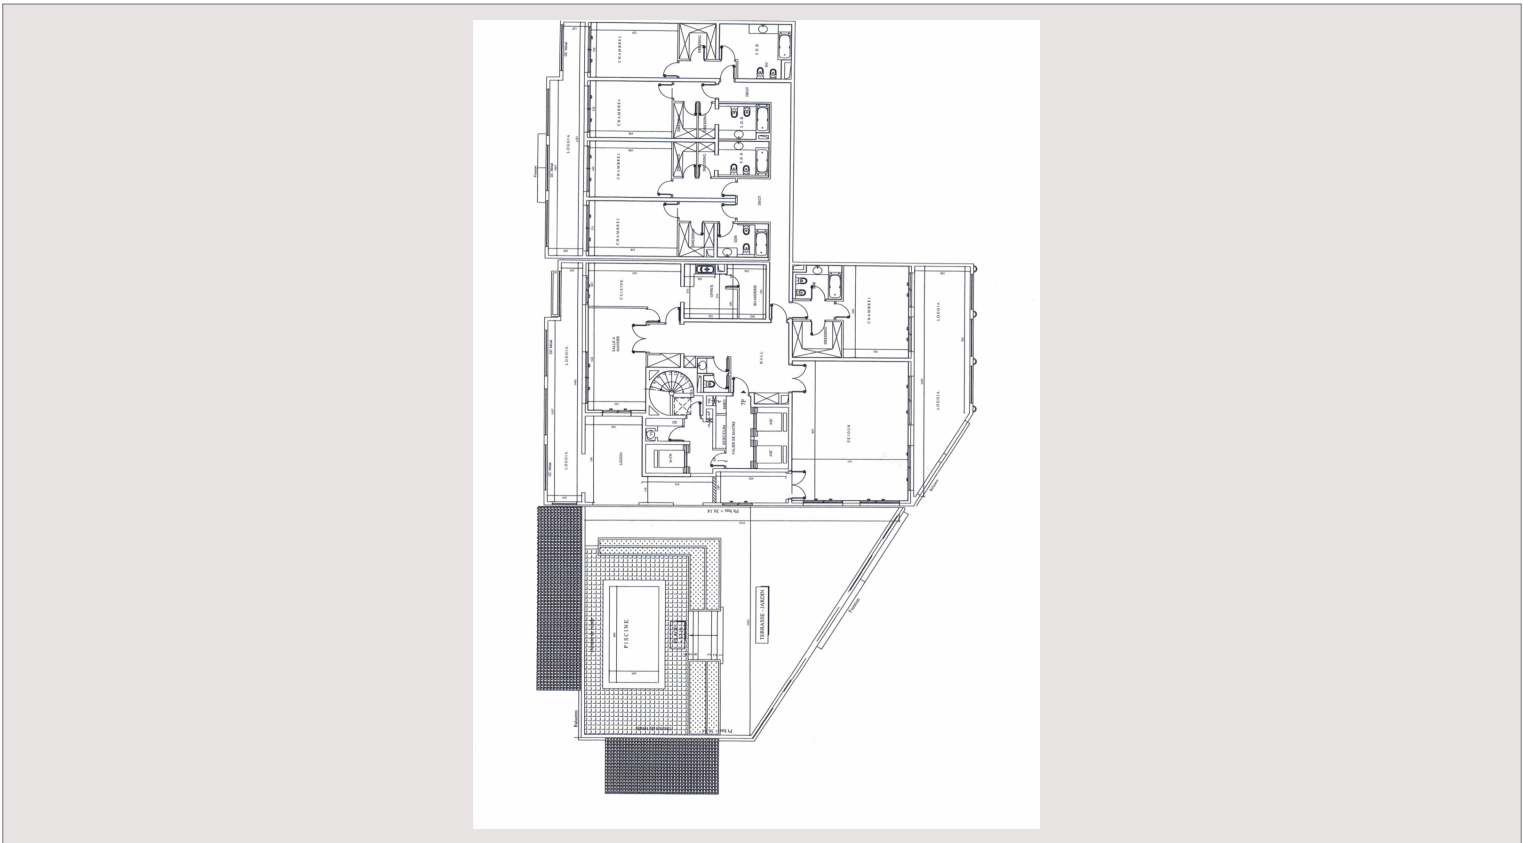

Supplement: mmc7 [file mmc7.pdf]
